# Supplementary material
Source: MDPI journal article supplement (https://www.mdpi.com/1424-2818/16/1/4)
Supplement: s1 [file s1]

**Table S2.** Butterfly species and their abundance in the Chenggong Campus of Yunnan University in different seasons and habitats

| Species                       | Season |        |        |        | Habitat         |              | Total | R <sub>a</sub> |
|-------------------------------|--------|--------|--------|--------|-----------------|--------------|-------|----------------|
|                               | Spring | Summer | Autumn | Winter | Scenery habitat | Road habitat |       |                |
| Hesperiidae                   |        |        |        |        |                 |              |       |                |
| <i>Pelopidas sinensis</i>     | 0      | 1      | 0      | 0      | 0               | 1            | 1     | 0.03           |
| <i>Carterocephalus alcina</i> | 2      | 1      | 2      | 0      | 3               | 2            | 5     | 0.14           |
| <i>Hasora anura</i>           | 0      | 4      | 0      | 0      | 0               | 4            | 4     | 0.11           |
| Papilionidae                  |        |        |        |        | 0               | 0            |       |                |
| <i>Papilio bianor</i>         | 2      | 0      | 1      | 0      | 2               | 1            | 3     | 0.08           |
| <i>Papilio xuthus</i>         | 5      | 1      | 0      | 0      | 5               | 1            | 6     | 0.17           |
| <i>Papilio protenor</i>       | 0      | 1      | 0      | 0      | 0               | 1            | 1     | 0.03           |
| <i>Papilio helenus</i>        | 2      | 1      | 0      | 0      | 1               | 2            | 3     | 0.08           |
| <i>Papilio polytes</i>        | 8      | 4      | 1      | 0      | 1               | 12           | 13    | 0.36           |
| <i>Graphium cloanthus</i>     | 40     | 26     | 5      | 0      | 44              | 27           | 71    | 1.96           |
| <i>Graphium sarpedon</i>      | 5      | 5      | 2      | 0      | 6               | 6            | 12    | 0.33           |
| <i>Byasa hedistus</i>         | 1      | 0      | 0      | 0      | 1               | 0            | 1     | 0.03           |
| Pieridae                      |        |        |        |        |                 |              |       |                |
| <i>Delias belladonna</i>      | 1      | 1      | 2      | 0      | 4               | 0            | 4     | 0.11           |
| <i>Colias fieldii</i>         | 42     | 18     | 16     | 20     | 83              | 13           | 96    | 2.65           |
| <i>Colias poliographus</i>    | 54     | 17     | 26     | 15     | 104             | 8            | 112   | 3.09           |
| <i>Pieris rapae</i>           | 223    | 989    | 77     | 19     | 1112            | 196          | 1308  | 36.08          |
| <i>Pieris canidia</i>         | 9      | 34     | 10     | 0      | 45              | 8            | 53    | 1.46           |
| <i>Pieris erutae</i>          | 66     | 57     | 27     | 2      | 139             | 13           | 152   | 4.19           |
| <i>Pieris brassicae</i>       | 0      | 14     | 2      | 0      | 16              | 0            | 16    | 0.44           |

| Species                    | Season |        |        |        | Habitat         |              | Total | R <sub>α</sub> |
|----------------------------|--------|--------|--------|--------|-----------------|--------------|-------|----------------|
|                            | Spring | Summer | Autumn | Winter | Scenery habitat | Road habitat |       |                |
| <i>Gonepteryx amintha</i>  | 16     | 8      | 0      | 0      | 10              | 14           | 24    | 0.66           |
| <i>Eurema mandarina</i>    | 16     | 63     | 97     | 13     | 130             | 59           | 189   | 5.21           |
| <i>Eurema laeta</i>        | 74     | 87     | 101    | 67     | 234             | 95           | 329   | 9.08           |
| <i>Eurema hecabe</i>       | 20     | 45     | 37     | 8      | 95              | 15           | 110   | 3.03           |
| <i>Appias albina</i>       | 44     | 0      | 0      | 0      | 25              | 19           | 44    | 1.21           |
| <i>Prioneris thestylis</i> | 1      | 1      | 0      | 0      | 1               | 1            | 2     | 0.06           |
| <i>Aporia agathon</i>      | 12     | 2      | 0      | 0      | 2               | 12           | 14    | 0.39           |
| <i>Catopsilia pomona</i>   | 6      | 4      | 0      | 0      | 3               | 7            | 10    | 0.28           |
| <i>Pontia edusa</i>        | 3      | 3      | 0      | 0      | 4               | 2            | 6     | 0.17           |
| <b>Nymphalidae</b>         |        |        |        |        |                 |              |       |                |
| <i>Polyura athamas</i>     | 0      | 0      | 1      | 0      | 1               | 0            | 1     | 0.03           |
| <i>Danaus genutia</i>      | 0      | 0      | 10     | 0      | 9               | 1            | 10    | 0.28           |
| <i>Danaus chrysippus</i>   | 0      | 0      | 32     | 1      | 33              | 0            | 33    | 0.91           |
| <i>Parantica sita</i>      | 2      | 8      | 49     | 0      | 40              | 19           | 59    | 1.63           |
| <i>Euploea mulciber</i>    | 1      | 0      | 1      | 0      | 2               | 0            | 2     | 0.06           |
| <i>Argynnis hyperbius</i>  | 8      | 5      | 4      | 0      | 14              | 3            | 17    | 0.47           |
| <i>Vanessa cardui</i>      | 31     | 9      | 1      | 1      | 35              | 7            | 42    | 1.16           |
| <i>Junonia orithya</i>     | 1      | 1      | 8      | 4      | 12              | 2            | 14    | 0.39           |
| <i>Dilipa morgiana</i>     | 1      | 0      | 0      | 0      | 1               | 0            | 1     | 0.03           |
| <i>Hestina persimilis</i>  | 2      | 0      | 0      | 0      | 2               | 0            | 2     | 0.06           |
| <i>Neptis soma</i>         | 0      | 1      | 3      | 0      | 2               | 2            | 4     | 0.11           |
| <i>Neptis sappho</i>       | 5      | 0      | 0      | 0      | 5               | 0            | 5     | 0.14           |
| <i>Neptis hylas</i>        | 8      | 0      | 0      | 0      | 7               | 1            | 8     | 0.22           |
| <i>Ypthima baldus</i>      | 205    | 67     | 79     | 0      | 293             | 58           | 351   | 9.68           |

| Species                      | Season |        |        |        | Habitat         |              | Total | $R_{\alpha}$ |
|------------------------------|--------|--------|--------|--------|-----------------|--------------|-------|--------------|
|                              | Spring | Summer | Autumn | Winter | Scenery habitat | Road habitat |       |              |
| <i>Mycalesis gotama</i>      | 3      | 6      | 13     | 0      | 22              | 0            | 22    | 0.61         |
| <i>Melanitis phedima</i>     | 0      | 0      | 3      | 0      | 3               | 0            | 3     | 0.08         |
| <i>Callerebia polyphemus</i> | 0      | 1      | 0      | 0      | 0               | 1            | 1     | 0.03         |
| <b>Riodinidae</b>            |        |        |        |        |                 |              |       |              |
| <i>Dodona durga</i>          | 3      | 0      | 1      | 0      | 0               | 4            | 4     | 0.11         |
| <i>Dodona ouida</i>          | 2      | 0      | 0      | 0      | 0               | 2            | 2     | 0.06         |
| <b>Lycaenidae</b>            |        |        |        |        |                 |              |       |              |
| <i>Rapala nissa</i>          | 0      | 1      | 0      | 0      | 1               | 0            | 1     | 0.03         |
| <i>Lampides boeticus</i>     | 117    | 115    | 56     | 9      | 257             | 40           | 297   | 8.19         |
| <i>Celastrina argiolus</i>   | 18     | 3      | 20     | 0      | 29              | 12           | 41    | 1.13         |
| <i>Pseudozizeeria maha</i>   | 29     | 40     | 46     | 1      | 71              | 45           | 116   | 3.2          |
| <b>Total</b>                 | 1088   | 1644   | 733    | 160    | 2909            | 716          | 3625  | 100          |

Note: Spring, March to May; Summer, June to August; Autumn, September to November; Winter, December to February of the next year.

Relative abundance:  $Ra = \frac{N_i}{N} \times 100$ .  $N_i$  is the number of individuals of species  $i$ , and  $N$  is the total number of individuals of all species.
