# Supplementary material
Source: MDPI journal article supplement (https://www.mdpi.com/1424-2818/16/1/4)
Supplement: s1 [file s1]

**Table S1.** List of butterflies in Chenggong Campus of Yunnan University (Up to October 2022)

| <b>Family name</b>  | <b>Genus name</b>      | <b>Species name</b>           |
|---------------------|------------------------|-------------------------------|
| <b>Hesperiidae</b>  | <i>Lobocla</i>         | <i>Lobocla bifasciata</i>     |
|                     | <i>Pelopidas</i>       | <i>Pelopidas sinensis</i>     |
|                     | <i>Ampittia</i>        | <i>Ampittia dioscorides</i>   |
|                     | <i>Potanthus</i>       | <i>Potanthus</i> sp.          |
|                     | <i>Carterocephalus</i> | <i>Carterocephalus alcina</i> |
|                     | <i>Hasora</i>          | <i>Hasora vitta</i>           |
| <b>Papilionidae</b> | <i>Papilio</i>         | <i>Hasora anura</i>           |
|                     |                        | <i>Papilio bianor</i>         |
|                     |                        | <i>Papilio xuthus</i>         |
|                     |                        | <i>Papilio protenor</i>       |
|                     |                        | <i>Papilio helenus</i>        |
|                     |                        | <i>Papilio polytes</i>        |
|                     | <i>Graphium</i>        | <i>Graphium cloanthus</i>     |
|                     |                        | <i>Graphium sarpedon</i>      |
|                     | <i>Byasa</i>           | <i>Byasa hedistus</i>         |
|                     | <i>Delias</i>          | <i>Delias belladonna</i>      |
| <b>Pieridae</b>     | <i>Ixias</i>           | <i>Ixias pyrene</i>           |
|                     | <i>Colias</i>          | <i>Colias fieldii</i>         |
|                     |                        | <i>Colias poliographus</i>    |
|                     |                        | <i>Pieris</i>                 |
|                     | <i>Pieris</i>          | <i>Pieris rapae</i>           |
|                     |                        | <i>Pieris canidia</i>         |
|                     |                        | <i>Pieris erutae</i>          |
|                     |                        | <i>Pieris brassicae</i>       |
|                     |                        | <i>Gonepteryx</i>             |
|                     | <i>Eurema</i>          | <i>Gonepteryx amintha</i>     |
|                     |                        | <i>Eurema mandarina</i>       |
|                     |                        | <i>Eurema laeta</i>           |
|                     |                        | <i>Eurema hecabe</i>          |
|                     | <i>Appias</i>          | <i>Appias albina</i>          |
|                     | <i>Prioneris</i>       | <i>Prioneris thestylis</i>    |
|                     | <i>Aporia</i>          | <i>Aporia agathon</i>         |
|                     | <i>Catopsilia</i>      | <i>Catopsilia pomona</i>      |
|                     | <i>Pontia</i>          | <i>Pontia edusa</i>           |
| <b>Nymphalidae</b>  | <i>Charaxes</i>        | <i>Charaxes bernardus</i>     |
|                     | <i>Polyura</i>         | <i>Polyura athamas</i>        |
|                     |                        | <i>Polyura dolon</i>          |
|                     |                        | <i>Danaus</i>                 |
|                     | <i>Danaus</i>          | <i>Danaus genutia</i>         |
|                     |                        | <i>Danaus chrysippus</i>      |
|                     |                        | <i>Parantica</i>              |
|                     | <i>Parantica</i>       | <i>Parantica sita</i>         |
|                     |                        | <i>Parantica swinhoei</i>     |
|                     | <i>Tirumala</i>        | <i>Tirumala septentrionis</i> |

|                   |                       |                              |
|-------------------|-----------------------|------------------------------|
|                   | <i>Euploea</i>        | <i>Euploea mulciber</i>      |
|                   | <i>Phalanta</i>       | <i>Phalanta phalantha</i>    |
|                   | <i>Argynnis</i>       | <i>Argynnis hyperbius</i>    |
|                   | <i>Childrena</i>      | <i>Childrena childreni</i>   |
|                   | <i>Polygonia</i>      | <i>Polygonia c-aureum</i>    |
|                   | <i>Vanessa</i>        | <i>Vanessa indica</i>        |
|                   |                       | <i>Vanessa cardui</i>        |
|                   | <i>Aglais</i>         | <i>Aglais chinensis</i>      |
|                   | <i>Junonia</i>        | <i>Junonia orithya</i>       |
|                   | <i>Calinaga</i>       | <i>Calinaga davidis</i>      |
|                   | <i>Dilipa</i>         | <i>Dilipa morgiana</i>       |
|                   | <i>Hestina</i>        | <i>Hestina nama</i>          |
|                   |                       | <i>Hestina persimilis</i>    |
|                   | <i>Neptis</i>         | <i>Neptis clinia</i>         |
|                   |                       | <i>Neptis mahendra</i>       |
|                   |                       | <i>Neptis soma</i>           |
|                   |                       | <i>Neptis sappho</i>         |
|                   |                       | <i>Neptis hylas</i>          |
|                   | <i>Ypthima</i>        | <i>Ypthima baldus</i>        |
|                   |                       | <i>Ypthima zodia</i>         |
|                   | <i>Mycalesis</i>      | <i>Mycalesis gotama</i>      |
|                   | <i>Melanitis</i>      | <i>Melanitis phedima</i>     |
|                   | <i>Callerebia</i>     | <i>Callerebia polyphemus</i> |
|                   | <i>Neope</i>          | <i>Neope yama</i>            |
|                   |                       | <i>Neope muirheadii</i>      |
| <b>Riodinidae</b> | <i>Dodona</i>         | <i>Dodona durga</i>          |
|                   |                       | <i>Dodona ouida</i>          |
| <b>Lycaenidae</b> | <i>Rapala</i>         | <i>Rapala micans</i>         |
|                   |                       | <i>Rapala nissa</i>          |
|                   | <i>Taraka</i>         | <i>Taraka hamada</i>         |
|                   | <i>Petrelaea</i>      | <i>Petrelaea dana</i>        |
|                   | <i>Lampides</i>       | <i>ampides boeticus</i>      |
|                   | <i>Celastrina</i>     | <i>Celastrina argiolus</i>   |
|                   | <i>Syntarucus</i>     | <i>Syntarucus plinius</i>    |
|                   | <i>Jamides</i>        | <i>Jamides bochus</i>        |
|                   | <i>Pseudozizeeria</i> | <i>Pseudozizeeria maha</i>   |

---

Note: This directory includes butterfly species recorded during transect surveys and citizen science processes on campus.
